# Supplementary material
Source: PubMed Central journal article supplement (PMC3910087)
Supplement: NIHMS549176-supplement-supplement_1.pdf [file NIHMS549176-supplement-supplement_1.pdf]

**Table S1 (related to Figure 5).** Crystallographic Data and Refinement Statistics

---

| <i>Diffraction data</i>             |                        |
|-------------------------------------|------------------------|
| Wavelength (Å)                      | 1.0                    |
| Space group                         | C2                     |
| Unit cell <i>a/b/c</i> (Å)          | 99.92 / 39.91 / 120.70 |
| Unit cell $\alpha/\beta/\gamma$ (°) | 90.00 / 94.82 / 90.00  |
| Resolution (Å)                      | 40.0-2.25 (2.33-2.25)  |
| Completeness (%)                    | 95.6 (80.0)            |
| Redundancy                          | 11.8 (6.2)             |
| $R_{merge}^a$ (%)                   | 9.1 (34.0)             |
| $I/\sigma$                          | 24.1 (3.0)             |
| <i>Refinement</i>                   |                        |
| Resolution (Å)                      | 40.0-2.25              |
| $R_{factor}^b$ (%)                  | 22.1                   |
| $R_{free}^c$ (%)                    | 27.9                   |
| Asymmetric unit content             |                        |
| Number of residues                  | 440 (dimer)            |
| Number of solvent atoms             | 283                    |
| Rmsd bond lengths (Å)               | 0.007                  |
| Rmsd bond angles (°)                | 0.957                  |
| Average B factors (Å <sup>2</sup> ) |                        |
| All atoms                           | 50.58                  |
| Protein atoms                       | 50.57                  |
| Solvent                             | 50.84                  |
| Residues in Ramachandran plot       |                        |
| Most favored regions (%)            | 97.53                  |
| Other allowed regions (%)           | 2.47                   |
| PDB code                            | 3OK8                   |

---

Values in parentheses correspond to highest resolution shell

<sup>a</sup>  $R_{merge} = \sum_{hkl} (|I - \langle I \rangle|) / \sum I$ , where  $I$  and  $\langle I \rangle$  are the observed and mean intensities of all the observations of reflection  $hkl$ , including its symmetry-related equivalents

<sup>b</sup>  $R_{factor} = \sum_{hkl} ||F_{obs}| - |F_{calc}|| / \sum |F_{obs}|$ , where  $F_{obs}$  and  $F_{calc}$  are the observed and calculated structure factors of reflection  $hkl$

<sup>c</sup>  $R_{free}$ ,  $R_{factor}$  calculated for a randomly selected subset of reflections (5%) that were not used in refinement

---
